# Supplementary material for: Functionally selective activation of the dopamine receptor D2 is mirrored by the protein expression profiles
Source: Springer Nature journal article supplement (doi:10.1038/s41598-021-83038-x), 2021-02-10
Supplement: 41598_2021_83038_MOESM2_ESM.pdf [file 41598_2021_83038_MOESM2_ESM.pdf]

## Supplementary Information

### Functionally selective activation of the dopamine receptor D<sub>2</sub> is mirrored by the protein expression profiles

*Deborah Wenk<sup>1</sup>, Vladimir Ignatchenko<sup>2</sup>, Andrew Macklin<sup>2</sup>, Harald Hübner<sup>3</sup>, Peter Gmeiner<sup>3</sup>, Dorothée Weikert<sup>3</sup>, Monika Pischetsrieder<sup>1\*</sup>, Thomas Kislinger<sup>2,4</sup>*

<sup>1</sup>Food Chemistry, Department of Chemistry and Pharmacy, Friedrich-Alexander Universität Erlangen-Nürnberg (FAU), Nikolaus-Fiebiger-Str. 10, 91058 Erlangen, Germany

<sup>2</sup>Princess Margaret Cancer Centre, University Health Network, 101 College Street, Toronto, ON, Canada

<sup>3</sup>Medicinal Chemistry, Department of Chemistry and Pharmacy, Friedrich-Alexander Universität Erlangen-Nürnberg (FAU), Nikolaus-Fiebiger-Str. 10, 91058 Erlangen, Germany

<sup>4</sup>University of Toronto, Department of Medical Biophysics, 101 College Street, Toronto, ON, Canada

\*Correspondence to: [monika.pischetsrieder@fau.de](mailto:monika.pischetsrieder@fau.de)

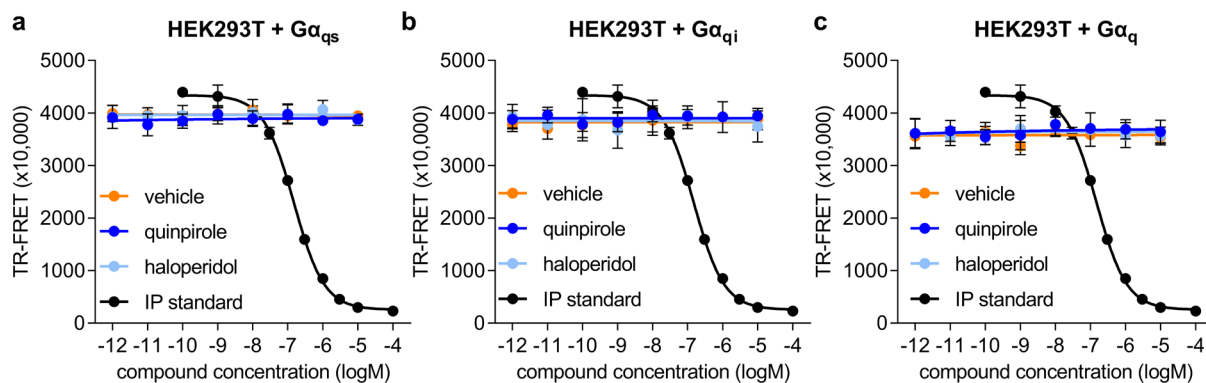

**Supplementary Figure S1.** G protein activation in HEK293T cells in the absence of overexpressed receptors. The contribution of endogenously expressed GPCRs to the observed signaling profiles in HEK293T cells was investigated on the level of the second messenger inositol monophosphate (IP) employing the IP-One HTRF assay (Cisbio). HEK293T cells were transfected with (a) the  $G\alpha_q$  subunit or (b) the hybrid G protein subunits  $G\alpha_{qs}$  or (c)  $G\alpha_{qi}$ <sup>1</sup> to detect activation of  $G\alpha_q$ -,  $G\alpha_s$ -, or  $G\alpha_i$ -coupled GPCRs under the same assay conditions. Independent from the transfected  $G\alpha$  subunit, neither quinpirole nor haloperidol induced substantial changes in the cellular IP level, pointing towards a negligible contribution of endogenously expressed GPCRs to the overall signaling profile observed in  $D_{25}R$  overexpressing cells. The data show the mean  $\pm$  standard deviation of  $n = 4$  independent experiments for quinpirole and haloperidol and  $n = 2$  for vehicle-treated cells. For comparison, a representative concentration-response curve obtained with an IP standard (in duplicates) is shown in panels (a-c).

<sup>1</sup> Broach, J. R. & Thorner, J. High-throughput screening for drug discovery. *Nature* **384** (suppl.), 14-16 doi:10.1038/384014a0 (1996).

**Table S2.** Functional terms associated with antagonist (haloperidol and sulpiride) treatment as determined by PCA. Proteins showing the 10% highest positive association with factor 1 in PCA were compared to a background of all 1462 differential proteins using the web-based platform g:Profiler<sup>2</sup> ( $p_{\text{adj}} \leq 0.05$ , query size 97).

| Source | Term name                                                     | Adjusted p-value | Term size | Intersection size |
|--------|---------------------------------------------------------------|------------------|-----------|-------------------|
| GO:BP  | transport                                                     | 2.98E-05         | 493       | 62                |
| GO:BP  | establishment of localization                                 | 1.03E-04         | 506       | 62                |
| GO:BP  | localization                                                  | 1.16E-04         | 593       | 68                |
| GO:BP  | lipid modification                                            | 5.56E-04         | 25        | 12                |
| GO:BP  | export from cell                                              | 1.05E-03         | 158       | 30                |
| GO:BP  | peroxisome organization                                       | 1.49E-03         | 14        | 9                 |
| GO:BP  | peroxisomal transport                                         | 1.49E-03         | 14        | 9                 |
| GO:BP  | protein transport                                             | 1.72E-03         | 285       | 42                |
| GO:BP  | organic substance transport                                   | 2.06E-03         | 321       | 45                |
| GO:BP  | amide transport                                               | 2.15E-03         | 287       | 42                |
| GO:BP  | peptide transport                                             | 2.15E-03         | 287       | 42                |
| GO:BP  | secretion by cell                                             | 2.42E-03         | 154       | 29                |
| GO:BP  | protein localization                                          | 2.55E-03         | 371       | 49                |
| GO:BP  | secretion                                                     | 3.09E-03         | 165       | 30                |
| GO:BP  | nitrogen compound transport                                   | 3.19E-03         | 302       | 43                |
| GO:BP  | establishment of protein localization                         | 5.12E-03         | 295       | 42                |
| GO:BP  | vesicle-mediated transport                                    | 5.50E-03         | 262       | 39                |
| GO:BP  | macromolecule localization                                    | 6.91E-03         | 394       | 50                |
| GO:BP  | response to organic substance                                 | 1.48E-02         | 317       | 43                |
| GO:BP  | protein targeting to peroxisome                               | 1.55E-02         | 13        | 8                 |
| GO:BP  | establishment of protein localization to peroxisome           | 1.55E-02         | 13        | 8                 |
| GO:BP  | protein localization to peroxisome                            | 1.55E-02         | 13        | 8                 |
| GO:BP  | cellular protein localization                                 | 1.95E-02         | 285       | 40                |
| GO:BP  | cellular macromolecule localization                           | 1.95E-02         | 285       | 40                |
| GO:BP  | exocytosis                                                    | 3.86E-02         | 117       | 23                |
| GO:BP  | regulated exocytosis                                          | 4.07E-02         | 100       | 21                |
| GO:CC  | integral component of membrane                                | 9.88E-30         | 191       | 62                |
| GO:CC  | intrinsic component of membrane                               | 2.91E-29         | 194       | 62                |
| GO:CC  | organelle membrane                                            | 1.47E-19         | 359       | 70                |
| GO:CC  | endoplasmic reticulum                                         | 8.48E-17         | 190       | 50                |
| GO:CC  | endomembrane system                                           | 1.96E-16         | 451       | 74                |
| GO:CC  | nuclear outer membrane-endoplasmic reticulum membrane network | 7.48E-15         | 115       | 38                |
| GO:CC  | endoplasmic reticulum membrane                                | 3.88E-14         | 113       | 37                |
| GO:CC  | bounding membrane of organelle                                | 5.62E-13         | 218       | 49                |
| GO:CC  | membrane                                                      | 5.88E-12         | 704       | 85                |
| GO:CC  | whole membrane                                                | 9.00E-10         | 190       | 42                |
| GO:CC  | integral component of plasma membrane                         | 1.96E-08         | 40        | 19                |
| GO:CC  | intrinsic component of plasma membrane                        | 3.46E-08         | 41        | 19                |
| GO:CC  | vesicle membrane                                              | 7.46E-06         | 92        | 25                |
| GO:CC  | cytoplasmic vesicle membrane                                  | 2.27E-05         | 89        | 24                |
| GO:CC  | microbody                                                     | 1.78E-04         | 19        | 11                |
| GO:CC  | peroxisome                                                    | 1.78E-04         | 19        | 11                |
| GO:CC  | intracellular vesicle                                         | 2.04E-04         | 267       | 42                |
| GO:CC  | cytoplasmic vesicle                                           | 2.04E-04         | 267       | 42                |

|                     |                                                       |          |      |    |
|---------------------|-------------------------------------------------------|----------|------|----|
| GO:CC               | membrane protein complex                              | 2.57E-04 | 107  | 25 |
| GO:CC               | vesicle                                               | 4.67E-04 | 416  | 54 |
| GO:CC               | Golgi apparatus                                       | 1.58E-03 | 170  | 31 |
| GO:CC               | secretory granule membrane                            | 1.58E-03 | 32   | 13 |
| GO:CC               | microbody membrane                                    | 1.92E-03 | 8    | 7  |
| GO:CC               | peroxisomal membrane                                  | 1.92E-03 | 8    | 7  |
| GO:CC               | plasma membrane                                       | 6.08E-03 | 274  | 40 |
| GO:CC               | Golgi membrane                                        | 8.82E-03 | 92   | 21 |
| GO:CC               | lytic vacuole membrane                                | 8.92E-03 | 55   | 16 |
| GO:CC               | lysosomal membrane                                    | 8.92E-03 | 55   | 16 |
| GO:CC               | cell periphery                                        | 9.06E-03 | 289  | 41 |
| GO:CC               | integral component of endoplasmic reticulum membrane  | 1.15E-02 | 21   | 10 |
| GO:CC               | lytic vacuole                                         | 1.32E-02 | 86   | 20 |
| GO:CC               | lysosome                                              | 1.32E-02 | 86   | 20 |
| GO:CC               | microbody lumen                                       | 1.55E-02 | 13   | 8  |
| GO:CC               | peroxisomal matrix                                    | 1.55E-02 | 13   | 8  |
| GO:CC               | intrinsic component of endoplasmic reticulum membrane | 1.99E-02 | 22   | 10 |
| GO:CC               | transport vesicle                                     | 2.03E-02 | 58   | 16 |
| GO:CC               | membrane-bounded organelle                            | 2.20E-02 | 1246 | 97 |
| GO:CC               | vacuole                                               | 2.34E-02 | 97   | 21 |
| GO:CC               | integral component of organelle membrane              | 2.41E-02 | 33   | 12 |
| GO:CC               | vacuolar membrane                                     | 2.63E-02 | 59   | 16 |
| KEGG <sup>3,4</sup> | Peroxisome                                            | 9.38E-06 | 10   | 9  |

<sup>2</sup> Raudvere, U. *et al.* g:Profiler: a web server for functional enrichment analysis and conversions of gene lists (2019 update). *Nucleic Acids Res.* **47**, W191-W198, doi:10.1093/nar/gkz369 (2019).

<sup>3</sup> Kanehisa, M. & Goto, S. KEGG: kyoto encyclopedia of genes and genomes. *Nucleic Acids Res.* **28**, 27-30, doi:10.1093/nar/28.1.27 (2000).

<sup>4</sup> Kanehisa, M. Toward understanding the origin and evolution of cellular organisms. *Protein Sci.* **28**, 1947-1951, doi:10.1002/pro.3715 (2019).

**Table S3.** Functional terms associated with quinpirole treatment as determined by PCA. All proteins showing a negative association with both factor 1 and factor 2 in PCA were compared to a background of all 1462 differential proteins using the web-based platform g:Profiler ( $p_{adj} \leq 0.05$ , query size 334).

| Source | Term name                               | Adjusted p-value | Term size | Intersection size |
|--------|-----------------------------------------|------------------|-----------|-------------------|
| GO:MF  | RNA binding                             | 8.77E-03         | 421       | 136               |
| GO:BP  | RNA processing                          | 2.54E-06         | 231       | 94                |
| GO:BP  | mitochondrial translation               | 1.13E-04         | 45        | 29                |
| GO:BP  | mitochondrial gene expression           | 2.48E-04         | 51        | 31                |
| GO:BP  | ncRNA processing                        | 6.81E-04         | 94        | 46                |
| GO:BP  | rRNA processing                         | 3.74E-03         | 58        | 32                |
| GO:BP  | rRNA metabolic process                  | 6.46E-03         | 59        | 32                |
| GO:BP  | mitochondrial translational elongation  | 1.02E-02         | 34        | 22                |
| GO:BP  | ribosome biogenesis                     | 1.55E-02         | 72        | 36                |
| GO:BP  | gene expression                         | 2.02E-02         | 626       | 185               |
| GO:BP  | mitochondrial translational termination | 2.98E-02         | 33        | 21                |
| GO:BP  | ncRNA metabolic process                 | 3.73E-02         | 117       | 50                |
| GO:BP  | ribonucleoprotein complex biogenesis    | 4.87E-02         | 102       | 45                |
| GO:CC  | mitochondrial matrix                    | 3.02E-07         | 115       | 59                |
| GO:CC  | membrane-enclosed lumen                 | 6.81E-07         | 776       | 233               |
| GO:CC  | organelle lumen                         | 6.81E-07         | 776       | 233               |
| GO:CC  | intracellular organelle lumen           | 6.81E-07         | 776       | 233               |
| GO:CC  | ribonucleoprotein complex               | 1.32E-04         | 177       | 74                |
| GO:CC  | mitochondrial protein complex           | 9.72E-04         | 43        | 27                |
| GO:CC  | organelle inner membrane                | 1.71E-03         | 54        | 31                |
| GO:CC  | mitochondrial membrane                  | 4.12E-03         | 72        | 37                |
| GO:CC  | mitochondrial inner membrane            | 6.60E-03         | 51        | 29                |
| GO:CC  | nuclear lumen                           | 9.40E-03         | 600       | 180               |
| GO:CC  | mitochondrion                           | 2.04E-02         | 216       | 80                |
| GO:CC  | mitochondrial ribosome                  | 2.41E-02         | 28        | 19                |
| GO:CC  | organellar ribosome                     | 2.41E-02         | 28        | 19                |
| REAC   | Mitochondrial translation elongation    | 1.02E-02         | 34        | 22                |
| REAC   | Mitochondrial translation initiation    | 1.37E-02         | 32        | 21                |
| REAC   | Mitochondrial translation               | 2.16E-02         | 35        | 22                |
| REAC   | Mitochondrial translation termination   | 2.98E-02         | 33        | 21                |

**Table S4.** Functional terms upregulated by MS308 as determined by gene set enrichment analysis<sup>5</sup>.

The table lists the 20 functional terms with the highest normalized enrichment score (NES).

| Source       | Term name                                                                          | Size | NES  | p-value | FDR   |
|--------------|------------------------------------------------------------------------------------|------|------|---------|-------|
| GOBP         | CELL-SUBSTRATE ADHESION                                                            | 28   | 1.85 | 0.004   | 0.457 |
| REACTOME     | MITOCHONDRIAL TRANSLATION                                                          | 76   | 1.85 | < 0.001 | 0.261 |
| GOBP         | MITOCHONDRIAL GENE EXPRESSION                                                      | 107  | 1.84 | < 0.001 | 0.196 |
| GOBP         | MITOCHONDRIAL TRANSLATION                                                          | 92   | 1.82 | 0.002   | 0.197 |
| REACTOME     | MITOCHONDRIAL TRANSLATION TERMINATION                                              | 71   | 1.80 | < 0.001 | 0.226 |
| GOBP         | CELL-MATRIX ADHESION                                                               | 20   | 1.80 | < 0.001 | 0.196 |
| GOBP         | MITOCHONDRIAL TRANSLATIONAL ELONGATION                                             | 73   | 1.80 | < 0.001 | 0.177 |
| REACTOME     | MITOCHONDRIAL TRANSLATION ELONGATION                                               | 72   | 1.80 | < 0.001 | 0.161 |
| REACTOME     | MITOCHONDRIAL TRANSLATION INITIATION                                               | 71   | 1.78 | < 0.001 | 0.179 |
| GOBP         | MITOCHONDRIAL TRANSLATIONAL TERMINATION                                            | 72   | 1.78 | 0.002   | 0.179 |
| GOBP         | TRANSLATIONAL TERMINATION                                                          | 78   | 1.77 | < 0.001 | 0.166 |
| GOBP         | TRANSLATIONAL ELONGATION                                                           | 87   | 1.77 | < 0.001 | 0.173 |
| REACTOME     | RUNX1 INTERACTS WITH CO-FACTORS WHOSE PRECISE EFFECT ON RUNX1 TARGETS IS NOT KNOWN | 24   | 1.75 | 0.006   | 0.196 |
| GOBP         | NUCLEOSIDE BIOSYNTHETIC PROCESS                                                    | 15   | 1.73 | < 0.001 | 0.243 |
| GOBP         | CELL ADHESION                                                                      | 101  | 1.73 | < 0.001 | 0.250 |
| GOBP         | POSITIVE REGULATION OF PROTEIN LOCALIZATION TO CELL PERIPHERY                      | 21   | 1.73 | 0.012   | 0.234 |
| WIKIPATHWAYS | ARRHYTHMOGENIC RIGHT VENTRICULAR CARDIOMYOPATHY                                    | 15   | 1.71 | 0.006   | 0.272 |
| WIKIPATHWAYS | PATHWAYS AFFECTED IN ADENOID CYSTIC CARCINOMA                                      | 31   | 1.71 | 0.002   | 0.278 |
| GOBP         | POSITIVE REGULATION OF PROTEIN LOCALIZATION TO PLASMA MEMBRANE                     | 17   | 1.70 | 0.004   | 0.272 |
| GOBP         | BIOLOGICAL ADHESION                                                                | 104  | 1.70 | 0.002   | 0.266 |

<sup>5</sup> Subramanian, A. *et al.* Gene set enrichment analysis: a knowledge-based approach for interpreting genome-wide expression profiles. *Proc. Natl. Acad. Sci. U. S. A.* **102**, 15545-15550, doi:10.1073/pnas.0506580102 (2005).

**Table S5.** Functional terms downregulated by MS308 as determined by gene set enrichment analysis.

The table lists the 20 functional terms with the lowest normalized enrichment score (NES).

| Source   | Term name                                                                   | Size | NES   | p-value | FDR   |
|----------|-----------------------------------------------------------------------------|------|-------|---------|-------|
| REACTOME | DEPOSITION OF NEW CENPA-CONTAINING NUCLEOSOMES AT THE CENTROMERE            | 18   | -1.89 | 0.002   | 0.463 |
| REACTOME | RNA POLYMERASE I PROMOTER ESCAPE                                            | 31   | -1.86 | < 0.001 | 0.383 |
| REACTOME | NUCLEOSOME ASSEMBLY                                                         | 18   | -1.85 | < 0.001 | 0.323 |
| GOBP     | CENP-A CONTAINING NUCLEOSOME ASSEMBLY                                       | 16   | -1.81 | 0.006   | 0.449 |
| GOBP     | PYRIMIDINE NUCLEOTIDE METABOLIC PROCESS                                     | 18   | -1.80 | 0.002   | 0.406 |
| GOBP     | TRANSCRIPTION ELONGATION FROM RNA POLYMERASE I PROMOTER                     | 23   | -1.78 | < 0.001 | 0.467 |
| GOBP     | CENP-A CONTAINING CHROMATIN ORGANIZATION                                    | 16   | -1.77 | < 0.001 | 0.461 |
| GOBP     | CHROMATIN REMODELING AT CENTROMERE                                          | 18   | -1.77 | 0.002   | 0.438 |
| GOBP     | DEOXYRIBONUCLEOTIDE METABOLIC PROCESS                                       | 18   | -1.75 | 0.012   | 0.510 |
| REACTOME | BASE EXCISION REPAIR                                                        | 38   | -1.74 | 0.002   | 0.498 |
| GOBP     | HISTONE EXCHANGE                                                            | 20   | -1.74 | 0.004   | 0.460 |
| REACTOME | FORMATION OF THE EARLY ELONGATION COMPLEX                                   | 32   | -1.74 | 0.008   | 0.452 |
| GOBP     | TRANSCRIPTION INITIATION FROM RNA POLYMERASE I PROMOTER                     | 25   | -1.73 | 0.010   | 0.436 |
| GOBP     | CENTROMERE COMPLEX ASSEMBLY                                                 | 22   | -1.73 | 0.006   | 0.425 |
| GOBP     | 7-METHYLGUANOSINE RNA CAPPING                                               | 29   | -1.72 | 0.008   | 0.432 |
| REACTOME | TRANSCRIPTIONAL REGULATION BY SMALL RNAS                                    | 46   | -1.71 | 0.008   | 0.472 |
| REACTOME | RNA POL II CTD PHOSPHORYLATION AND INTERACTION WITH CE DURING HIV INFECTION | 26   | -1.70 | 0.004   | 0.512 |
| GOBP     | RNA CAPPING                                                                 | 30   | -1.70 | 0.002   | 0.491 |
| REACTOME | MRNA CAPPING                                                                | 28   | -1.70 | 0.010   | 0.479 |
| REACTOME | RNA POL II CTD PHOSPHORYLATION AND INTERACTION WITH CE                      | 26   | -1.69 | 0.006   | 0.486 |
